# Supplementary material for: Beyond structural motifs: the frontier of actinide-containing metal–organic frameworks
Source: Royal Society of Chemistry journal article supplement (doi:10.1039/d1sc01827b), 2021-01-01
Supplement: d1sc01827b1.pdf [file d1sc01827b1.pdf]

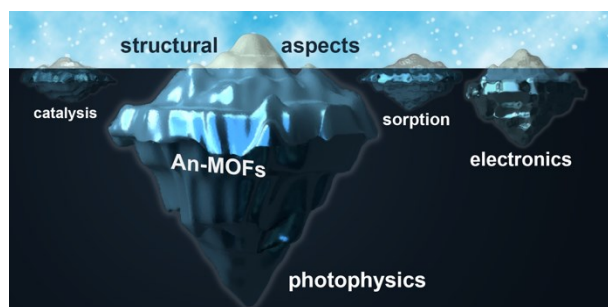

This perspective deviates from exclusively focusing on structural features of actinide-containing metal-organic frameworks (An-MOFs) and pivots toward the prospect of An-MOFs as avant-garde materials with an emphasis on their physicochemical properties.
